# Supplementary material
Source: PubMed Central journal article supplement (PMC4261064)

**Supplemental Figure 1. Sun et al.**

**WT**

***Sp4* Hypo**

**NWK2**

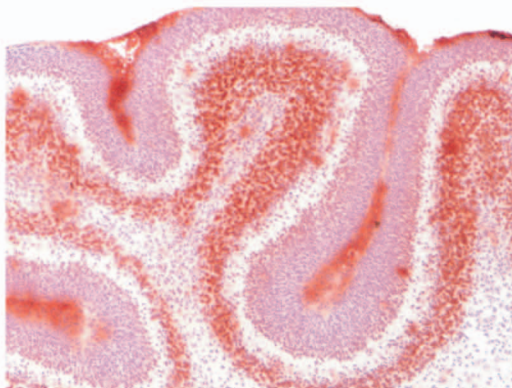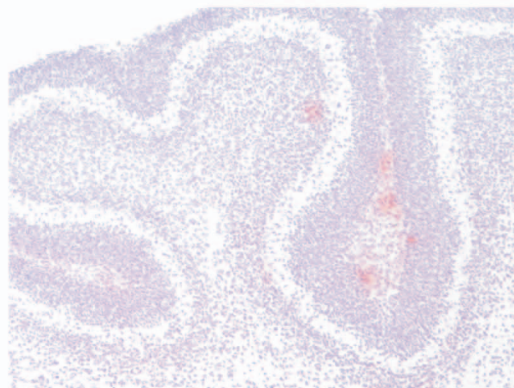

**NeuN**

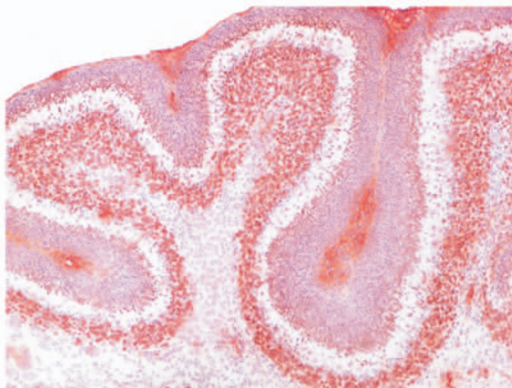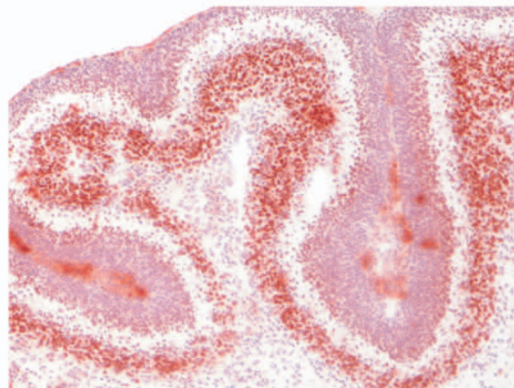

# Supplemental Figure 2. Sun et al.

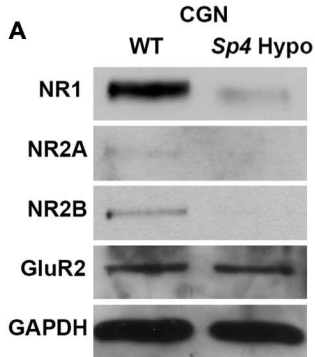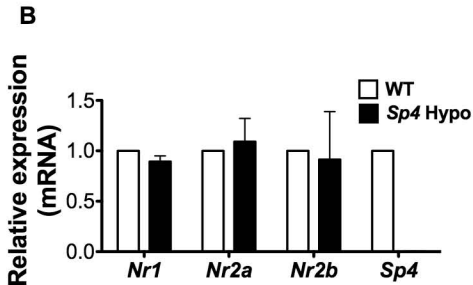

## Supplemental Figure 3. Sun et al.

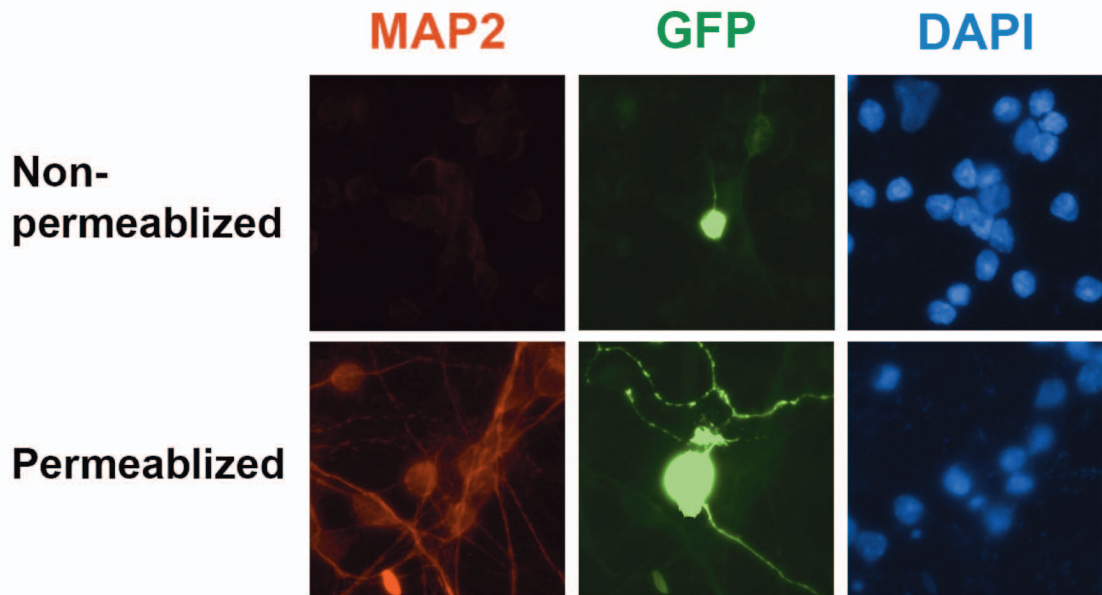

Supplement: NIHMS614667-supplement-Supp_FigureS1-S4.pdf [file NIHMS614667-supplement-Supp_FigureS1-S4.pdf]
